# Supplementary material
Source: publisher figshare collection journal article supplement (https://tandf.figshare.com/articles/dataset/_/1577600)
Supplement: Supplementary file 1 [file 1]

Archive with 4 entries (4 files):
- iiht_a_937882_sm0001.pdf
- iiht_a_937882_sm0002.pdf
- iiht_a_937882_sm0003.pdf
- iiht_a_937882_sm0004.pdf
